# Supplementary material
Source: MDPI journal article supplement (https://www.mdpi.com/1999-4907/13/3/374)
Supplement: s1 [file s1]

## Supplementary Figure and Table

**Table S1.** Geographic locations, genetic diversity, and mean seed traits of the sampled populations from the pine populations.

| Species                                       | Location                   | Population | lon     | lat     | Alt<br>(m) | genetic<br>diversity<br>(mtDNA) | genetic<br>diversity<br>(cpDNA) | seed<br>wide<br>(mm) | seed<br>length<br>(mm) | seed mass<br>(100seeds/g) |
|-----------------------------------------------|----------------------------|------------|---------|---------|------------|---------------------------------|---------------------------------|----------------------|------------------------|---------------------------|
| <i>Pinus. yunnanensis</i>                     | 1 Tengchong, China         | TCPy       | 98.58   | 24.91   | 1776       | 0                               | 0.303                           | 2.2237               | 5.8867                 | 1.698                     |
|                                               | 2 Baoshan, China           | BSPy       | 99.1333 | 24.4667 | 1966       | 0.264                           | 0.282                           | 2.169                | 5.966                  | 1.824                     |
|                                               | 3 Lijiang, China           | LJPy       | 100.217 | 26.8833 | 2651       | 0.718                           | 0.404                           | 2.1497               | 4.6483                 | 1.355                     |
|                                               | 4 Jianshui, China          | JSPy       | 102.95  | 23.8333 | 2003       | 0.75                            | 0.37                            | 2.2407               | 5.5307                 | 1.969                     |
|                                               | 5 Kunming, China           | KMPy       | 102.617 | 24.91   | 2041       | 0.467                           | 0.315                           | 2.1627               | 5.389                  | 1.53                      |
|                                               | 6 Yiliang, China           | YLPy       | 103.167 | 24.7167 | 1846       | 0.133                           | 0.505                           | 2.151                | 5.503                  | 1.681                     |
|                                               | 7 Wenshan, China           | WSPy01     | 104.241 | 23.4219 | 1434       | 0.719                           | 0.4                             | 2.1617               | 5.5643                 | 1.819                     |
|                                               | 8 Wenshan, China           | WSPy02     | 104.23  | 26.53   | 1573       | 0.682                           | 0.341                           | 2.1667               | 5.67                   | 1.908                     |
|                                               | 9 Xilin, Guangxi, China    | XLPy       | 104.617 | 24.5979 | 857        | 0.747                           | 0.337                           | 2.4647               | 6.1393                 | 2.141                     |
|                                               | 10 Longlin, Guangxi, China | LLPy       | 104.963 | 24.6907 | 1294       | 0.5                             | 0.297                           | 2.362                | 6.078                  | 2.061                     |
|                                               | 11 Leye, Guangxi, China    | LYPy       | 106.366 | 24.8044 | 1336       | 0.362                           | 0.265                           | 2.2967               | 6.2323                 | 2.257                     |
|                                               | 12 DaLi yunlong, China     | DLPy       | 99.29   | 25.87   | 2572       | 0                               | 0.402                           | 2.078                | 5.3693                 | 1.373                     |
| <i>P. kesiya</i> var.<br><i>langbianensis</i> | 13 Mojiang, China          | MJPK       | 101.608 | 23.4036 | 1690       | 0.505                           | 0.407                           | 2.1667               | 5.372                  | 1.72                      |
|                                               | 14 JingDong, China         | JDPK       | 100.636 | 24.7022 | 1713       | 0.833                           | 0.418                           | 2.2253               | 5.5643                 | 1.735                     |
|                                               | 15 Zhengyuan, China        | ZYPK       | 101.14  | 23.8781 | 1109       | 0.824                           | 0.418                           | 2.188                | 5.3573                 | 1.544                     |
|                                               | 16 Ninger, China           | NEPK       | 100.973 | 23.1847 | 1004       | 0.682                           | 0.372                           | 2.3673               | 6.0127                 | 2.06                      |

|                  |                           |        |          |         |      |       |       |        |        |       |
|------------------|---------------------------|--------|----------|---------|------|-------|-------|--------|--------|-------|
| <i>P. kesiya</i> | 17 Jinggu,China           | JGPK   | 100.5    | 23.4912 | 1707 | 0.692 | 0.347 | 2.2417 | 5.577  | 1.686 |
|                  | 18 Simao, China           | SMPk   | 100.948  | 22.7074 | 1340 | 0.641 | 0.32  | 2.5617 | 5.8973 | 1.962 |
|                  | 19 Dadugang,China         | DDGPk  | 100.992  | 22.4172 | 1113 | 0.476 | 0.442 | 2.3687 | 5.6117 | 1.774 |
|                  | 20 Jinghong Hejian, China | JHPk02 | 100.513  | 22.2446 | 1244 | 0.857 | 0.39  | 2.3417 | 5.895  | 2.018 |
|                  | 21 Samneua, Laos          | SNPk   | 103.964  | 20.2158 | 1399 | 0.371 | 0.376 | 2.4257 | 6.0483 | 2.203 |
|                  | 22 Phonsavan, Laos        | FSWPK  | 103.1182 | 19.4996 | 1070 | 0.821 | 0.383 | 2.1697 | 5.6277 | 1.572 |
|                  | 23 Attapeu, Laos          | ASPPk  | 107.189  | 15.2223 | 1061 | 0.808 | 0.132 | 2.3427 | 5.646  | 2.014 |
|                  | 24 La Pan Tan,Vietnam     | V04    | 104.1333 | 21.75   | 1410 | 0.923 | 0.117 | 2.6487 | 5.8627 | 2.484 |
|                  | 25 Dak Nong, Vietnam      | V08    | 107.4333 | 12.15   | 1493 | 0.659 | 0.12  | 2.1507 | 5.0657 | 1.45  |
|                  | 26 QingMai,Thailand       | T0421  | 98.817   | 19.317  | 1353 | 0.25  | 0.044 | 2.401  | 6.0513 | 1.969 |
|                  | 27 Nong Krating, Thailand | T0463  | 98.283   | 17.933  | 1022 | 0     | 0.221 | 2.5543 | 5.952  | 2.101 |
|                  | 28 Hod, Thailand          | T0465  | 98.417   | 18.167  | 442  | 0.182 | 0.03  | 2.4167 | 5.6633 | 1.856 |

---

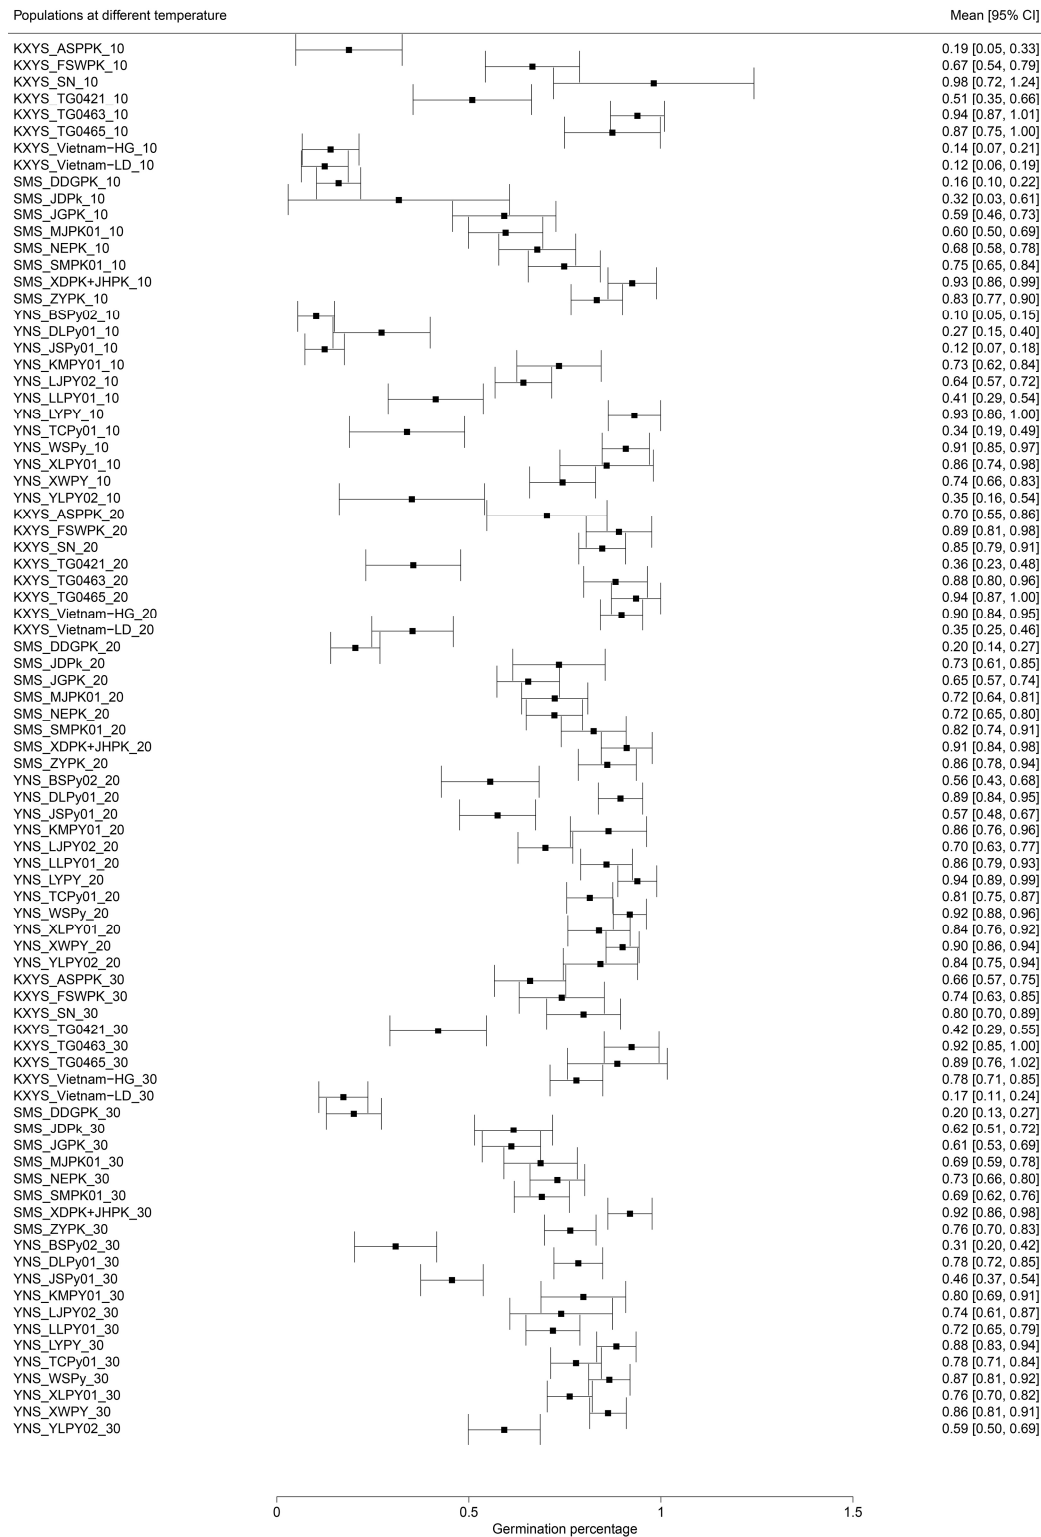

Figure S1 Germination percentage estimated based on the meta-analytic approach.

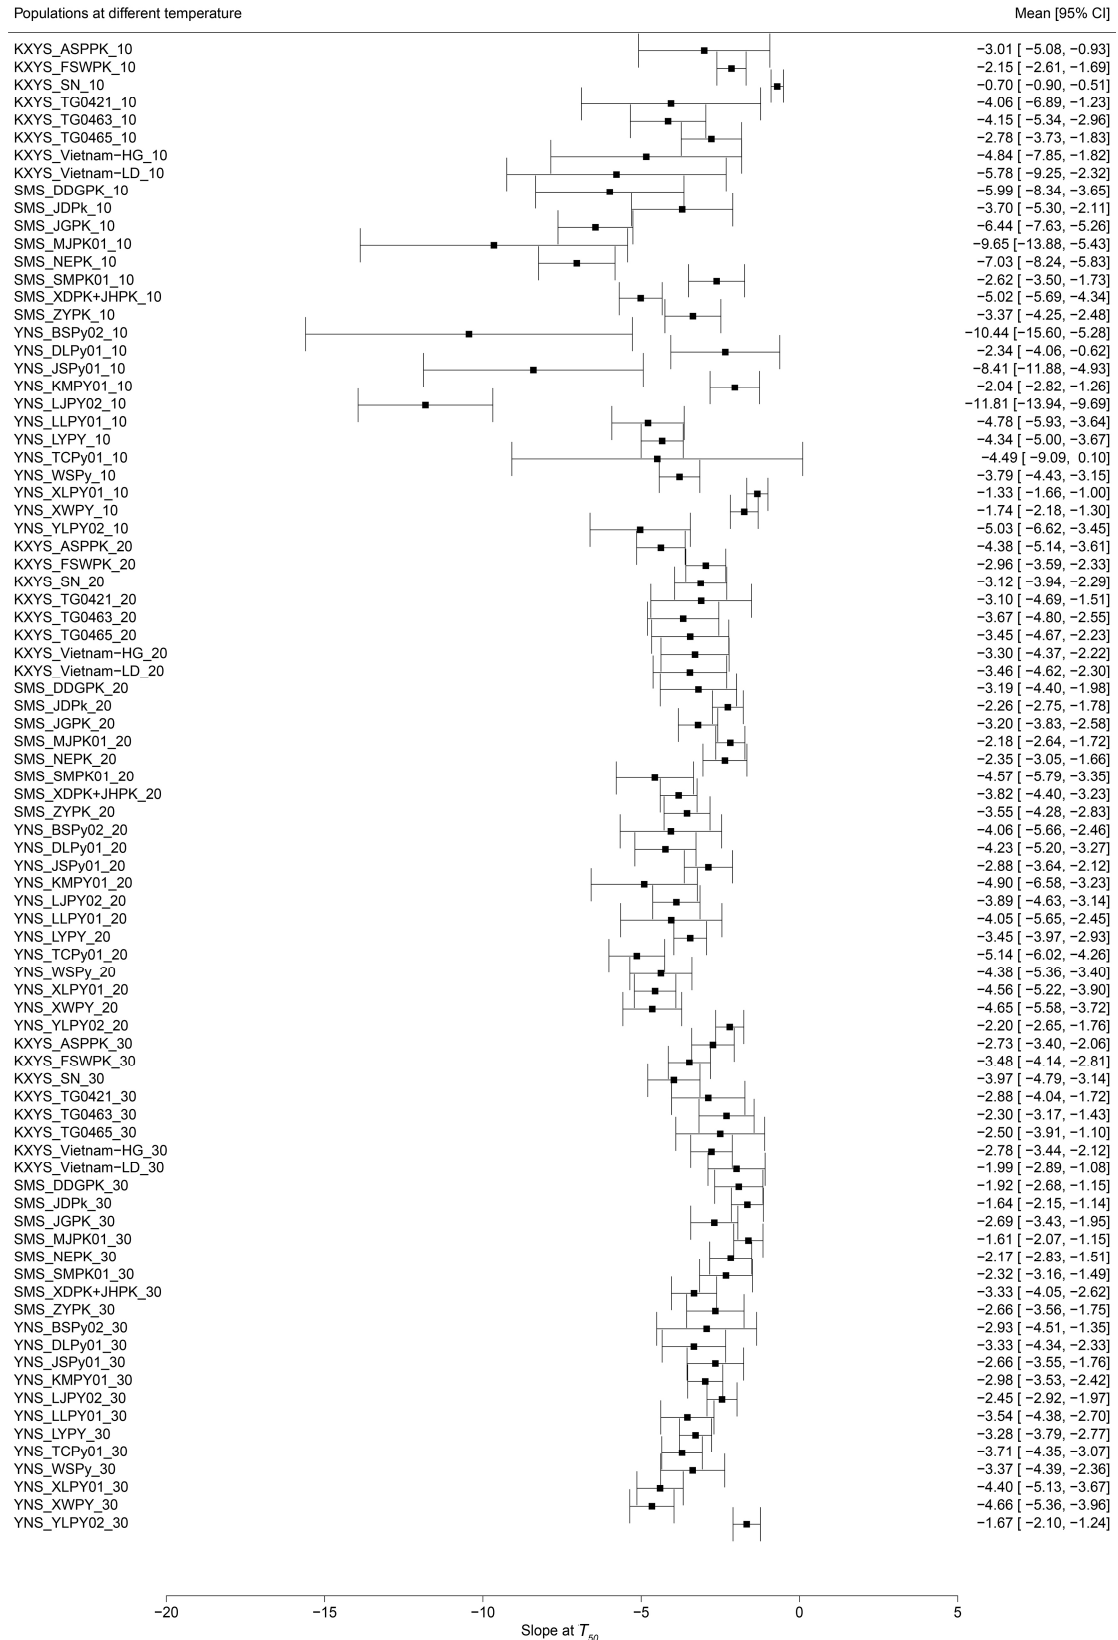

Figure S2 The  $D$  (Slope  $T_{50}$ ) estimated based on the meta-analytic approach.

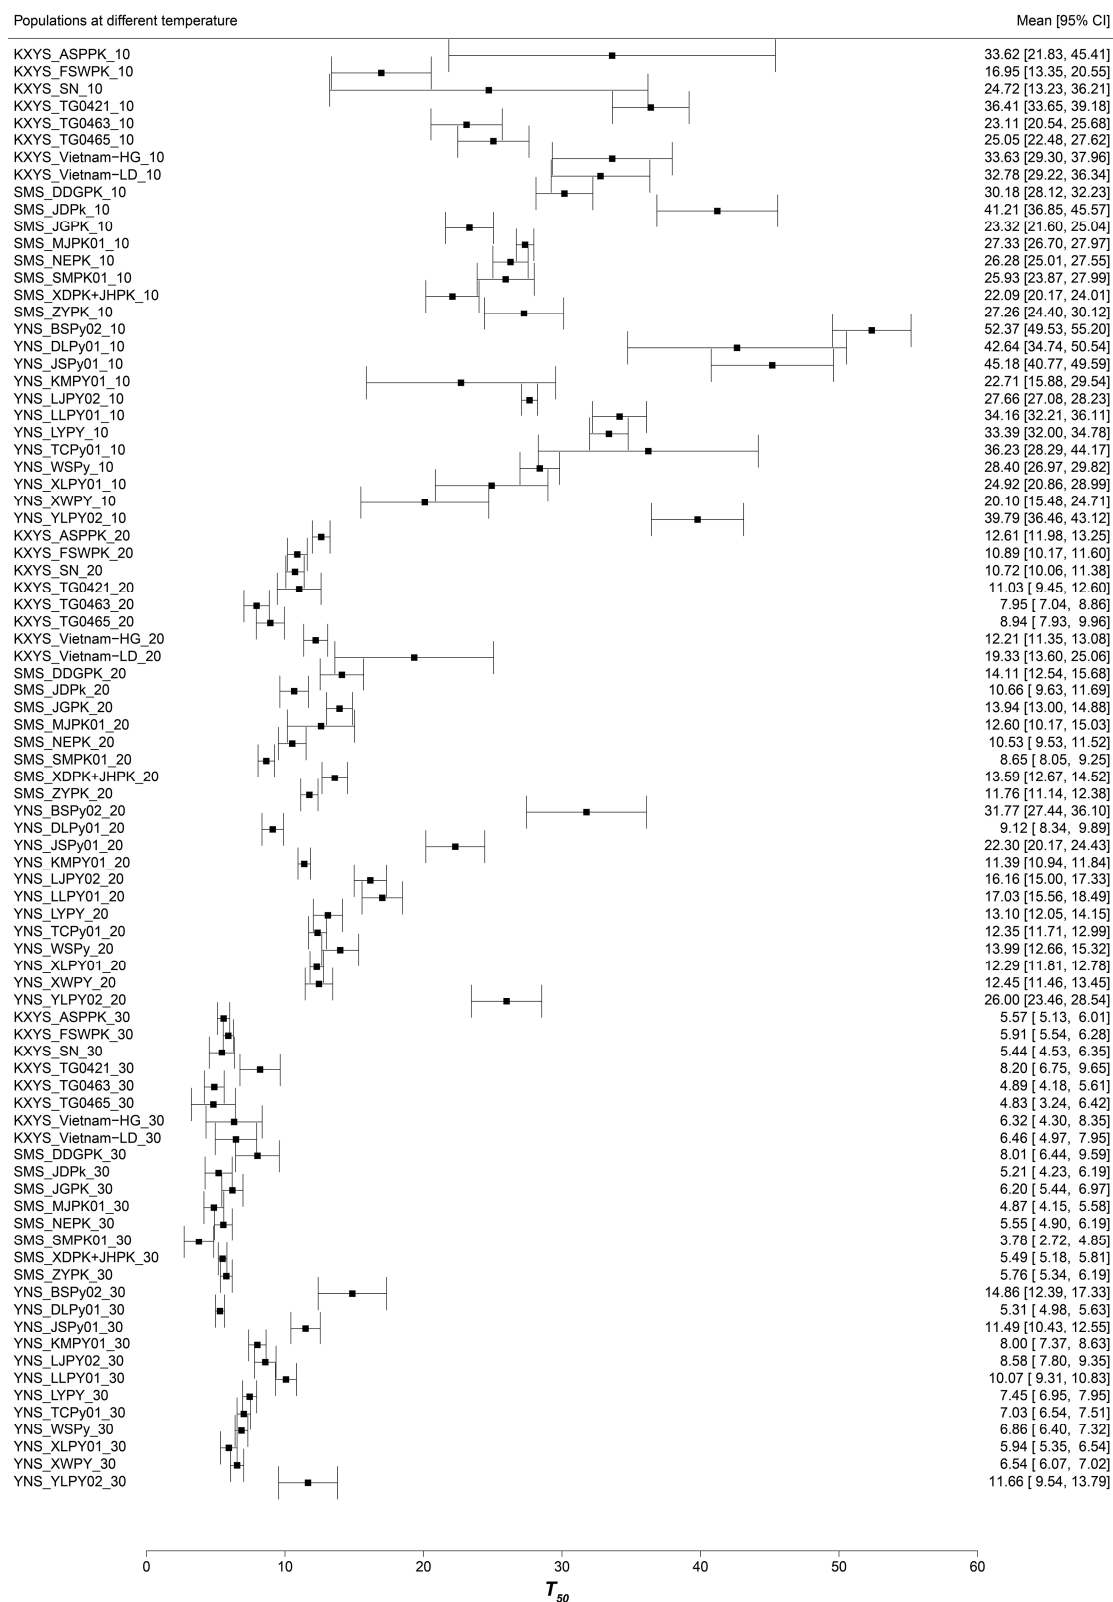

Figure S3  $T_{50}$  estimated based on the meta-analytic approach.
